# Supplementary material
Source: publisher figshare collection journal article supplement (https://acs.figshare.com/ndownloader/files/27366863)

# checkCIF/PLATON report

Structure factors have been supplied for datablock(s) flik190208

THIS REPORT IS FOR GUIDANCE ONLY. IF USED AS PART OF A REVIEW PROCEDURE FOR PUBLICATION, IT SHOULD NOT REPLACE THE EXPERTISE OF AN EXPERIENCED CRYSTALLOGRAPHIC REFEREE.

No syntax errors found.      CIF dictionary      Interpreting this report

## Datablock: flik190208

---

Bond precision:    C-C = 0.0017 Å                      Wavelength=0.71073

Cell:                      a=12.3507(5)              b=13.6579(6)              c=12.1808(5)  
                                alpha=90                      beta=90.577(2)              gamma=90

Temperature:              120 K

|                | Calculated   | Reported     |
|----------------|--------------|--------------|
| Volume         | 2054.61(15)  | 2054.61(15)  |
| Space group    | P 21/c       | P 21/c       |
| Hall group     | -P 2ybc      | -P 2ybc      |
| Moiety formula | C10 H13 N O4 | C10 H13 N O4 |
| Sum formula    | C10 H13 N O4 | C10 H13 N O4 |
| Mr             | 211.21       | 211.21       |
| Dx,g cm-3      | 1.366        | 1.366        |
| Z              | 8            | 8            |
| Mu (mm-1)      | 0.106        | 0.106        |
| F000           | 896.0        | 896.0        |
| F000'          | 896.52       |              |
| h,k,lmax       | 17,19,17     | 17,19,17     |
| Nref           | 6024         | 6002         |
| Tmin,Tmax      | 0.963,0.974  | 0.687,0.746  |
| Tmin'          | 0.958        |              |

Correction method= # Reported T Limits: Tmin=0.687 Tmax=0.746  
AbsCorr = MULTI-SCAN

Data completeness= 0.996                      Theta(max)= 30.054

R(reflections)= 0.0509( 5474)              wR2(reflections)= 0.1441( 6002)

S = 1.120                      Npar= 285

---

The following ALERTS were generated. Each ALERT has the format

**test-name\_ALERT\_alert-type\_alert-level.**

Click on the hyperlinks for more details of the test.

---

### Alert level B

PLAT934\_ALERT\_3\_B Number of (Iobs-Icalc)/Sigma(W) > 10 Outliers .. 2 Check

---

### Alert level C

PLAT906\_ALERT\_3\_C Large K Value in the Analysis of Variance ..... 4.365 Check  
PLAT911\_ALERT\_3\_C Missing FCF Refl Between Thmin & STh/L= 0.600 19 Report  
PLAT913\_ALERT\_3\_C Missing # of Very Strong Reflections in FCF .... 6 Note  
PLAT977\_ALERT\_2\_C Check Negative Difference Density on H5A -0.35 eA-3  
PLAT977\_ALERT\_2\_C Check Negative Difference Density on H5C -0.39 eA-3

---

### Alert level G

PLAT910\_ALERT\_3\_G Missing # of FCF Reflection(s) Below Theta(Min). 1 Note  
PLAT912\_ALERT\_4\_G Missing # of FCF Reflections Above STh/L= 0.600 3 Note  
PLAT978\_ALERT\_2\_G Number C-C Bonds with Positive Residual Density. 13 Info  
PLAT992\_ALERT\_5\_G Repd & Actual \_reflns\_number\_gt Values Differ by 2 Check

---

0 **ALERT level A** = Most likely a serious problem - resolve or explain  
1 **ALERT level B** = A potentially serious problem, consider carefully  
5 **ALERT level C** = Check. Ensure it is not caused by an omission or oversight  
4 **ALERT level G** = General information/check it is not something unexpected

0 ALERT type 1 CIF construction/syntax error, inconsistent or missing data  
3 ALERT type 2 Indicator that the structure model may be wrong or deficient  
5 ALERT type 3 Indicator that the structure quality may be low  
1 ALERT type 4 Improvement, methodology, query or suggestion  
1 ALERT type 5 Informative message, check

---

## Validation response form

Please find below a validation response form (VRF) that can be filled in and pasted into your CIF.

```
# start Validation Reply Form
_vrf_PLAT934_flik190208
;
PROBLEM: Number of (Iobs-Icalc)/Sigma(W) > 10 Outliers ..          2 Check
RESPONSE: ...
;
_vrf_PLAT906_flik190208
;
PROBLEM: Large K Value in the Analysis of Variance .....          4.365 Check
RESPONSE: ...
;
_vrf_PLAT911_flik190208
;
PROBLEM: Missing FCF Refl Between Thmin & STh/L=      0.600          19 Report
RESPONSE: ...
;
_vrf_PLAT913_flik190208
;
PROBLEM: Missing # of Very Strong Reflections in FCF ....          6 Note
RESPONSE: ...
;
_vrf_PLAT977_flik190208
;
```

PROBLEM: Check Negative Difference Density on H5A

-0.35 eA-3

RESPONSE: ...

;

# end Validation Reply Form

---

It is advisable to attempt to resolve as many as possible of the alerts in all categories. Often the minor alerts point to easily fixed oversights, errors and omissions in your CIF or refinement strategy, so attention to these fine details can be worthwhile. In order to resolve some of the more serious problems it may be necessary to carry out additional measurements or structure refinements. However, the purpose of your study may justify the reported deviations and the more serious of these should normally be commented upon in the discussion or experimental section of a paper or in the "special\_details" fields of the CIF. checkCIF was carefully designed to identify outliers and unusual parameters, but every test has its limitations and alerts that are not important in a particular case may appear. Conversely, the absence of alerts does not guarantee there are no aspects of the results needing attention. It is up to the individual to critically assess their own results and, if necessary, seek expert advice.

### **Publication of your CIF in IUCr journals**

A basic structural check has been run on your CIF. These basic checks will be run on all CIFs submitted for publication in IUCr journals (*Acta Crystallographica*, *Journal of Applied Crystallography*, *Journal of Synchrotron Radiation*); however, if you intend to submit to *Acta Crystallographica Section C* or *E* or *IUCrData*, you should make sure that full publication checks are run on the final version of your CIF prior to submission.

### **Publication of your CIF in other journals**

Please refer to the *Notes for Authors* of the relevant journal for any special instructions relating to CIF submission.

---

**PLATON version of 05/12/2020; check.def file version of 05/12/2020**

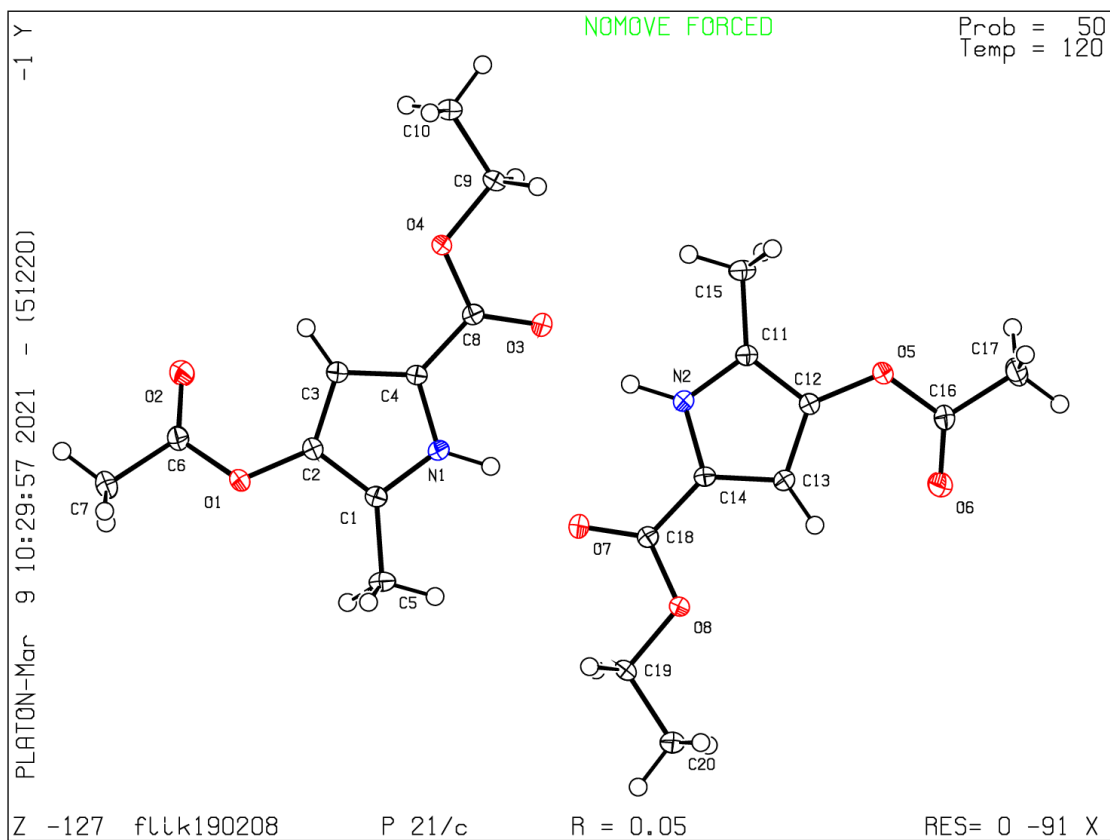

Supplement: Supplementary file [file 27366863]
